# Supplementary material for: Bio-inspired perylene diimide coated super paramagnetic nanoparticles for the effective and efficient removal of lead(ii) from aqueous medium
Source: Royal Society of Chemistry journal article supplement (doi:10.1039/d0ma00477d), 2020-01-01
Supplement: d0ma00477d1.pdf [file d0ma00477d1.pdf]

**Electronic Supplementary Information (ESI)**

**Bio-Inspired Perylene Diimide Coated Super Paramagnetic Nano Particles  
for Effective and Efficient Removal of Lead (II) from Aqueous Medium**

**Sucharita Dey,<sup>a</sup> Shouvik Mahanty,<sup>b</sup> Ankita Saha,<sup>a</sup> Prince Kumar,<sup>a</sup> Rajdeep Saha,<sup>a</sup>  
Chirantan Kar,<sup>a</sup> Punarbasu Chaudhuri<sup>b</sup> and Pradip Kr. Sukul<sup>a</sup> \***

<sup>a</sup>Department of Chemistry, Amity Institute of Applied Sciences, Amity University Kolkata,  
Kolkata, Action Area-II, Kadampukur, New Town, Rajarhat, Kolkata-700135, India

<sup>b</sup>Department of Environmental Science, University of Calcutta, Ballygunge Circular Road,  
Kolkata-700019

E-mail ID: [psukul@kol.amity.edu](mailto:psukul@kol.amity.edu), [sukul.ochem@gmail.com](mailto:sukul.ochem@gmail.com)

**Table of contents**

|                                                                 |    |
|-----------------------------------------------------------------|----|
| 1) Zeta Potentials of NPLD and NPLD-Pb .....                    | S2 |
| 2) Bar plot of pH (2-8) dependence adsorption of lead (II)..... | S3 |
| 3) Reusability of NPLD for lead (II) adsorption .....           | S4 |

Fig. S1:

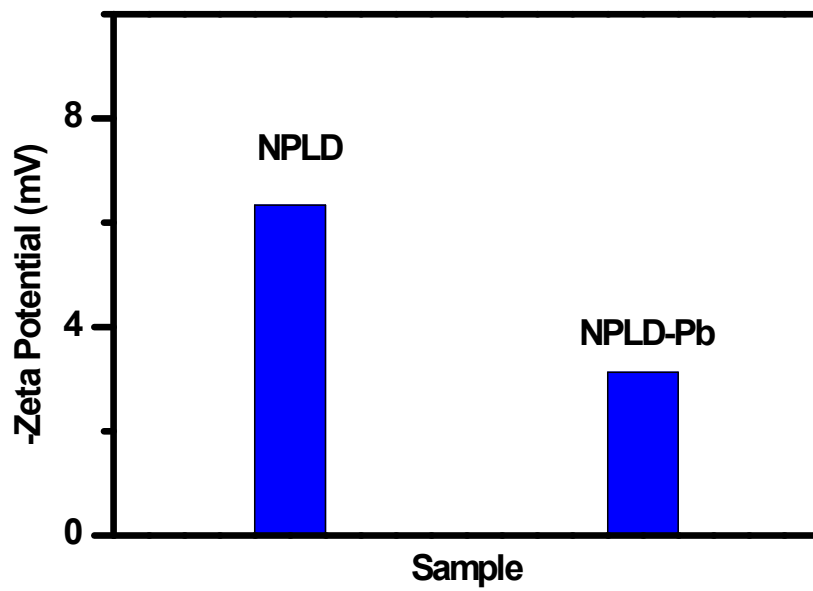

Fig. S1. Zeta Potentials of NPLD and NPLD-Pb.

Fig. S2

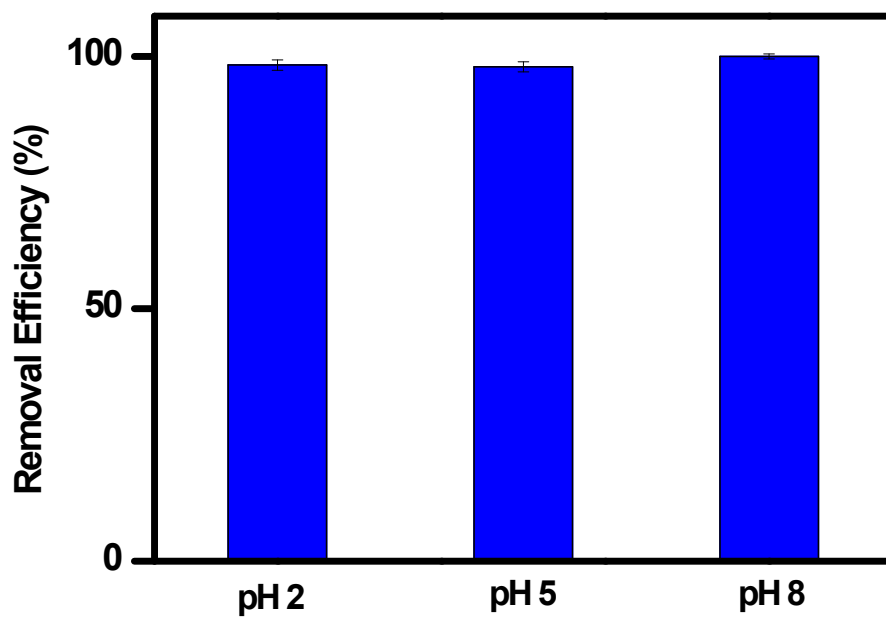

**Fig. S2.** Bar plot of pH (2-8) dependence adsorption of lead (II) (10 ppm) by NPLD measured by ICP-OES. In case of pH 2 & 5 adsorption capacities remained same almost around 96% whereas in basic medium the adsorption capacity showed maximum value.

Fig. S3

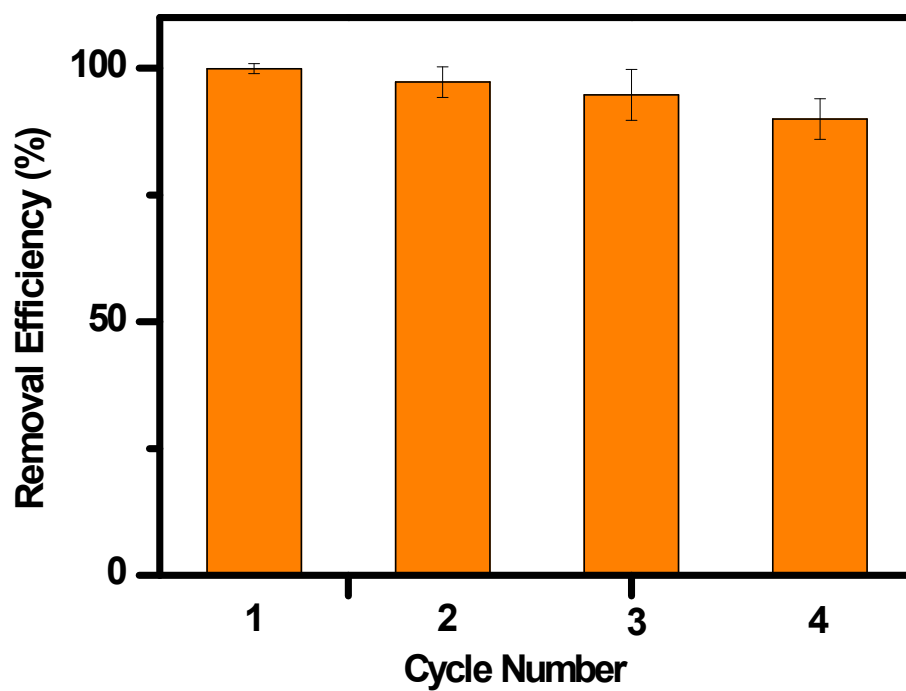

**Fig. S3: (a)** Reusability of NPLD for lead (II) adsorption repeated in 4 cycle, after 2 cycle regeneration of NPLD was approx. 98%, from cycle 3 & 4 regeneration reduced to 95%.
